# Supplementary material
Source: publisher figshare collection journal article supplement (https://frontiersin.figshare.com/ndownloader/files/24646274)
Supplement: Supplementary file [file 24646274]

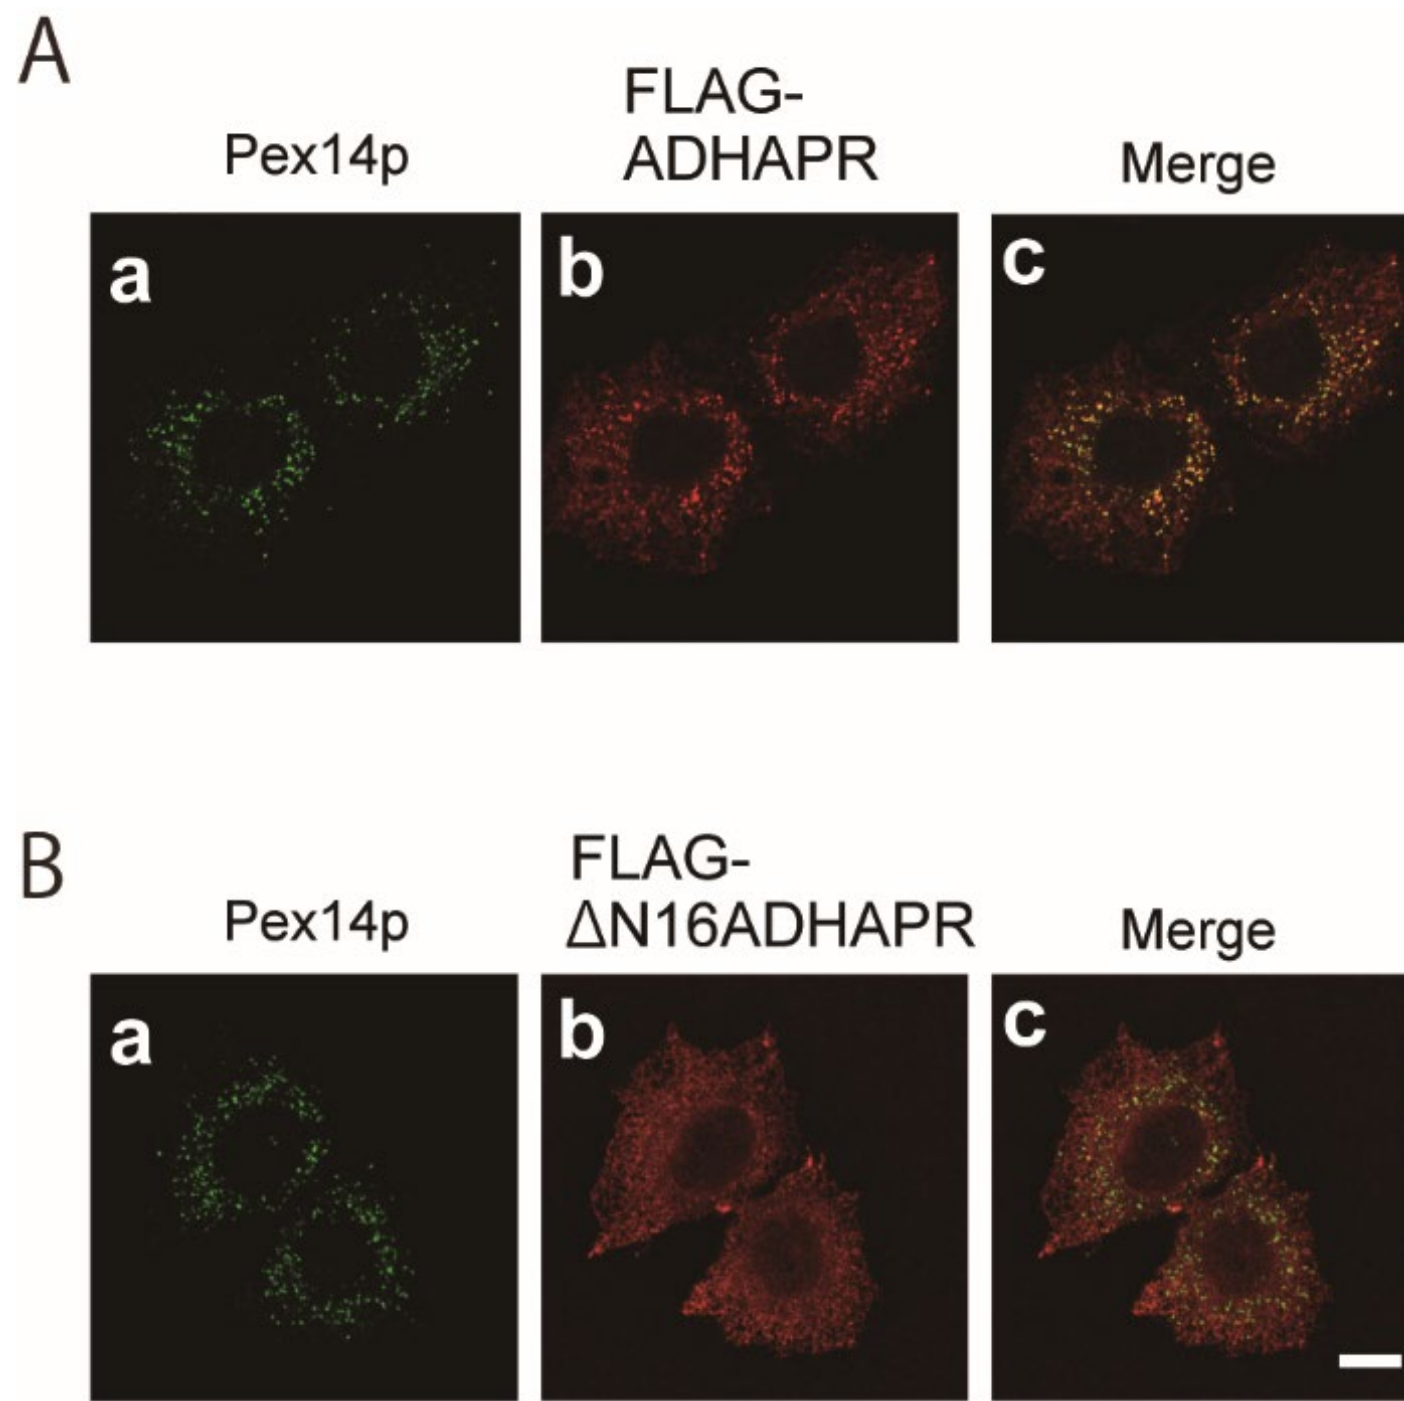

Figure S1. Immunofluorescent images of FAA.K1B cells stably expressing FLAG-ADHAPR and FLAG- $\Delta$ N16ADHAPR. A) Intracellular localization of FLAG-ADHAPR was assessed in the FAA.K1B cell line stably expressing FLAG-ADHAPR by the immunofluorescence staining. FLAG-ADHAPR was verified with monoclonal anti-FLAG antibody (b) and peroxisomes were visualized by immunostaining with anti-Pex14p antibody (a), respectively. Merged views are shown in (c). B) Intracellular localization of FLAG- $\Delta$ N16ADHAPR was likewise assessed. Bar, 10  $\mu$ m.
